# Supplementary material
Source: Springer Nature journal article supplement (https://www.springermedizin.de/resource/supplementary/13046_2010_367_MOESM1_ESM.pdf/9661868)

# A Training Data

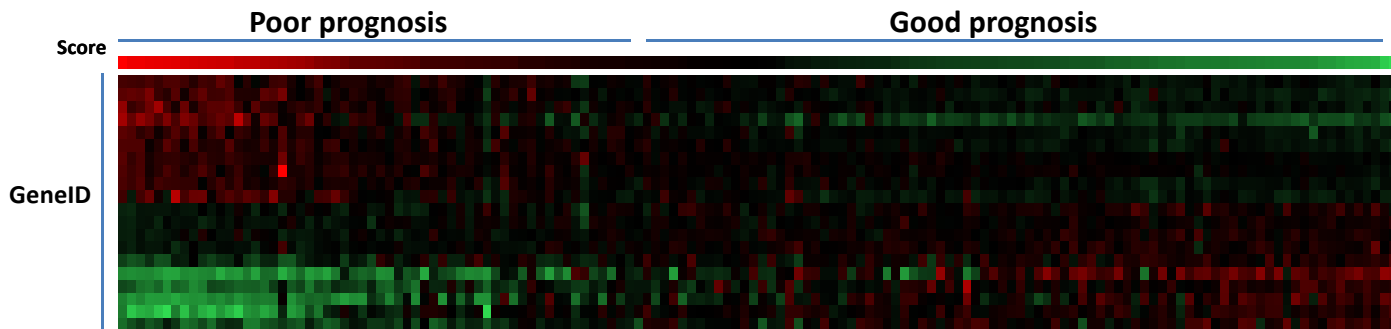

## B

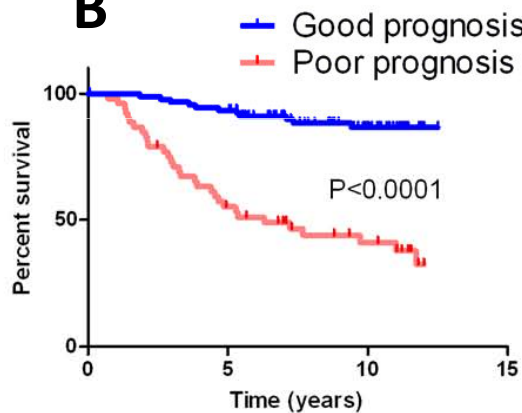

## C

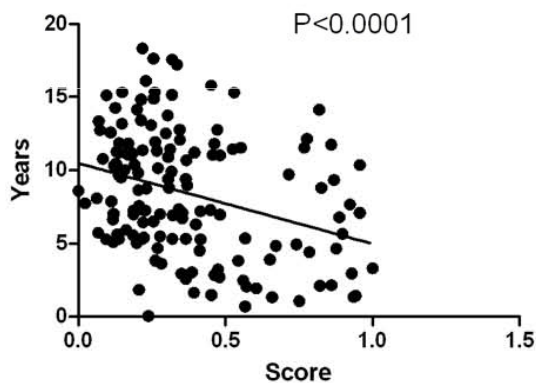

## D

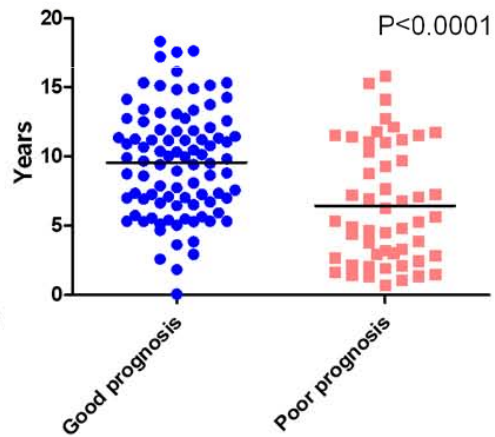

Supplement: MOESM1 [file 9661868]
